# Supplementary material for: Anion-templated assembly of multinuclear copper(ii)–triazole complexes
Source: Royal Society of Chemistry journal article supplement (doi:10.1039/d0nj02832k), 2020-01-01
Supplement: d0nj02832k1.pdf [file d0nj02832k1.pdf]

## Electronic Supplementary Information

### **Anion-Templated Construction of Copper(II) Clusters with Triazole Ligands**

Mohan Gopalakrishnan,<sup>†</sup> Nuttaporn Krittametaporn,<sup>†</sup> Nobuto Yoshinari,<sup>‡</sup> Takumi Konno,<sup>‡</sup> and  
Preeyanuch Sangtrirutnugul<sup>†,\*</sup>

\* Corresponding author. Email: preeyanuch.san@mahidol.ac.th

<sup>†</sup>Center of Excellence for Innovation in Chemistry (PERCH-CIC), Department of Chemistry, Faculty of Science, Mahidol University, Bangkok, 10400, Thailand.

<sup>‡</sup>Department of Chemistry, Graduate School of Science, Osaka University, Toyonaka, Osaka 560-0043, Japan

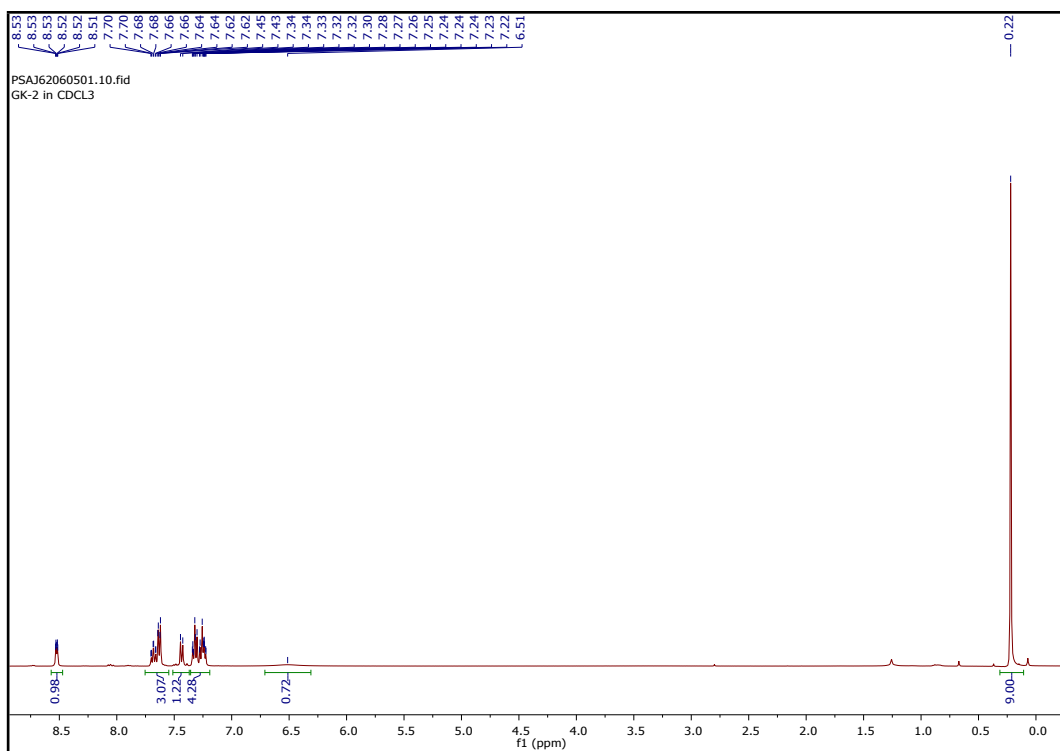

**Figure S1.**  $^1\text{H}$ NMR spectrum ( $\text{CDCl}_3$ ) of 1-(2-pyridyl)-1-phenyl-3-trimethylsilylpropagyl-alcohol.

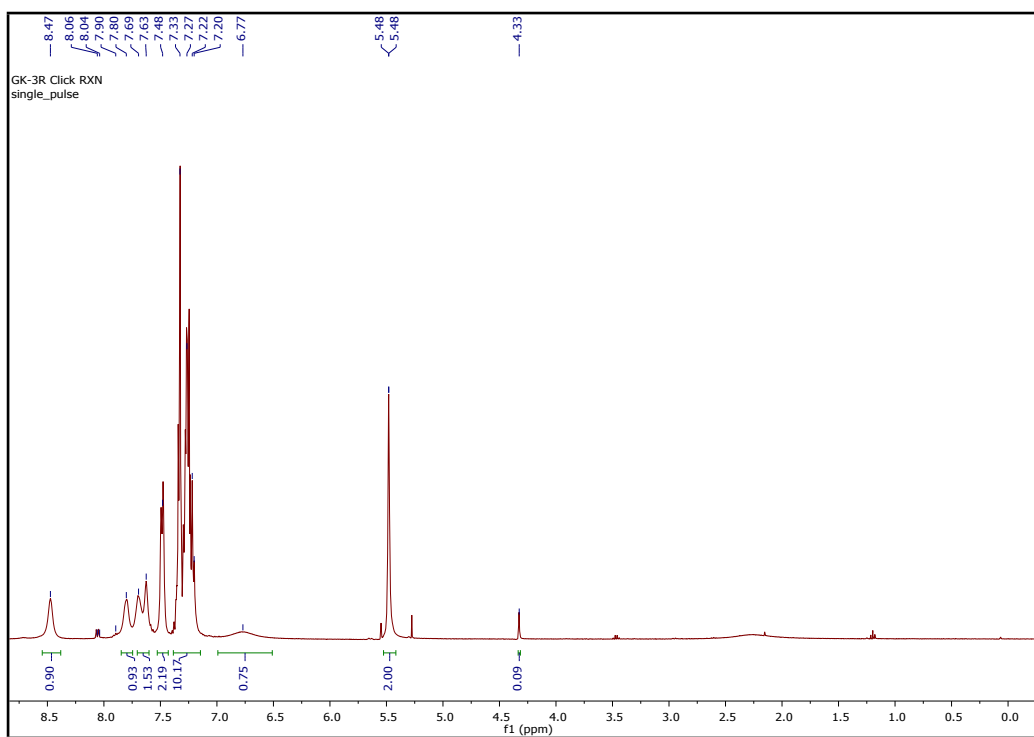

**Figure S2.**  $^1\text{H}$ NMR spectrum ( $\text{CDCl}_3$ ) of Hpytm.

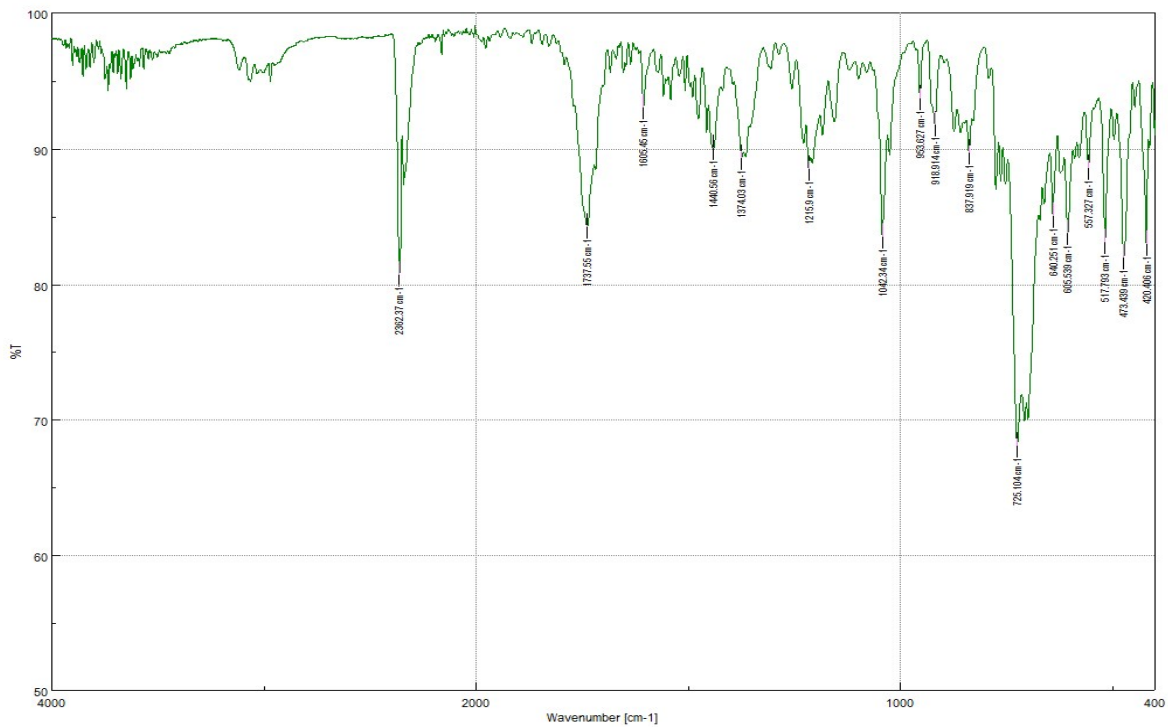

**Figure S3.** FT-IR spectrum of  $[\text{Cu}_6(\text{pytm})_6(\text{SiF}_6)](\text{SiF}_6)_2$  (1).

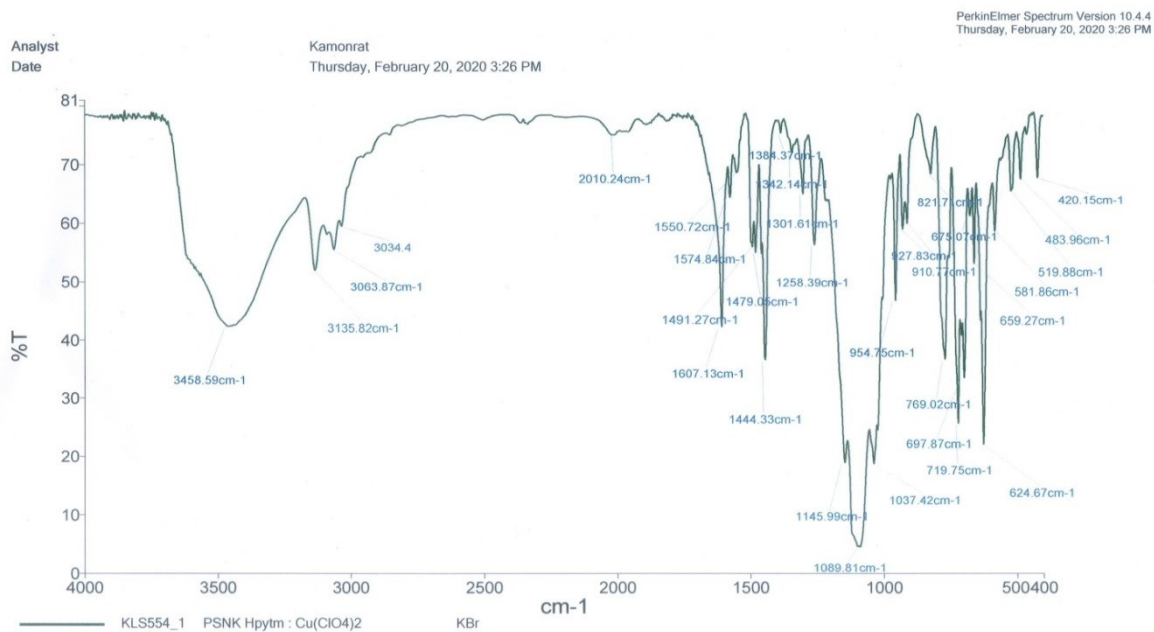

**Figure S4.** FT-IR spectrum of  $\{[\text{Cu}_3(\text{pytm})_3(\text{ClO}_4)](\text{ClO}_4)_2\}_n$  (2).

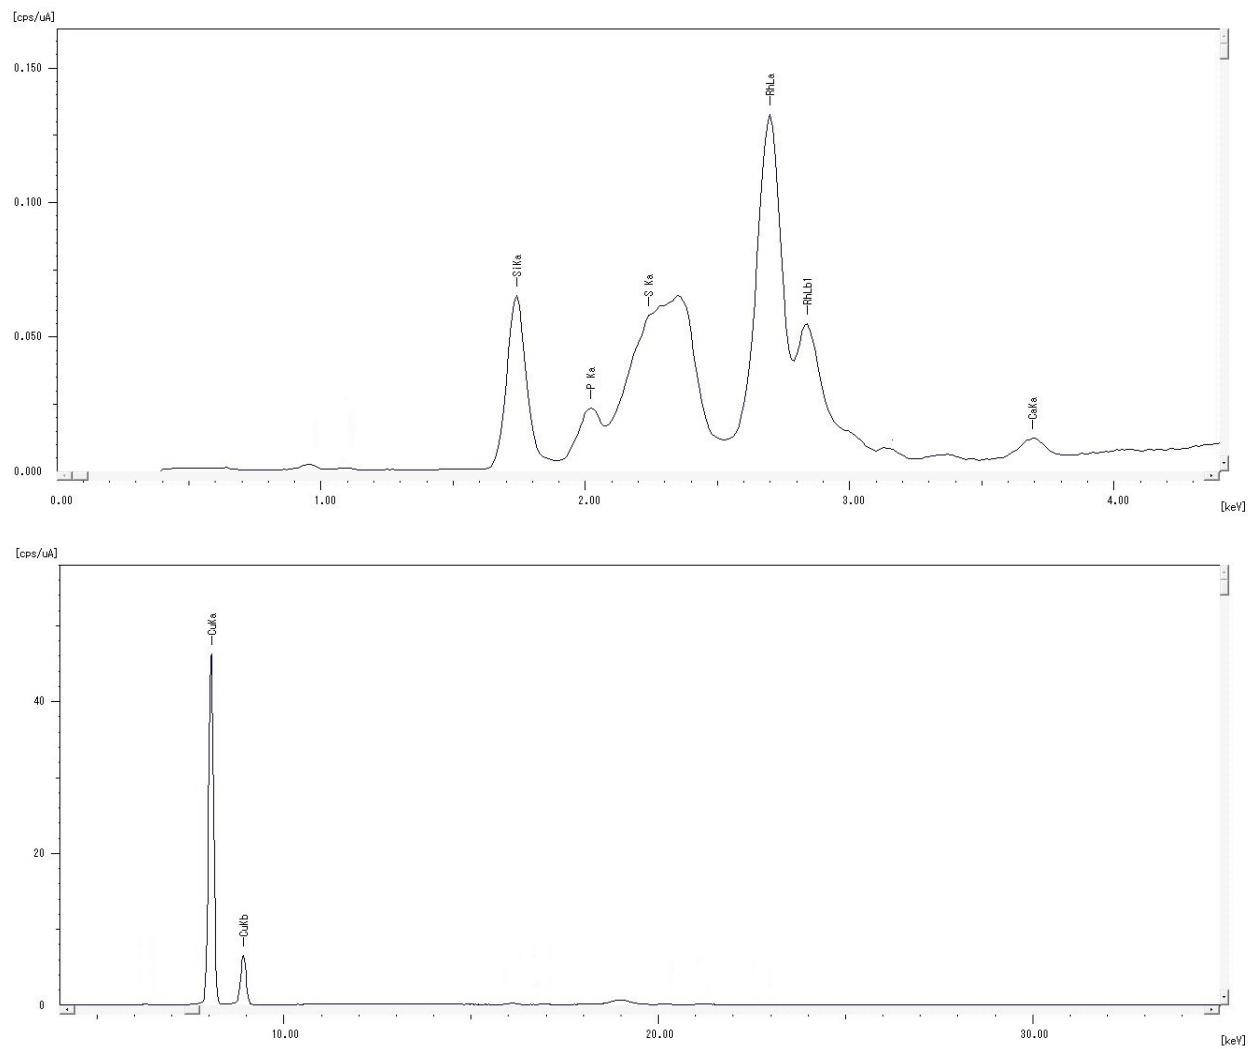

**Figure S5.** XRF spectrum of  $[\text{Cu}_6(\text{pytm})_6(\text{SiF}_6)](\text{SiF}_6)_2$  (**1**). (Top) 0–4.4 keV, (bottom) 4–35 keV.

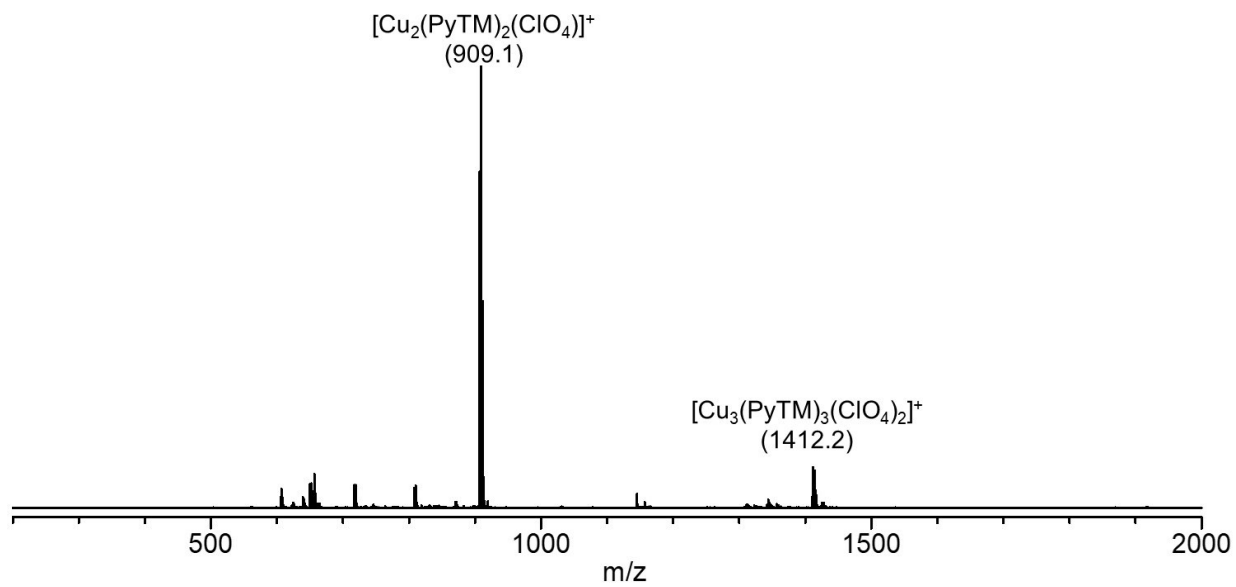

**Figure S6.** ESI-MS spectra of  $\{[\text{Cu}_3(\text{pytm})_3(\text{ClO}_4)](\text{ClO}_4)_2\}_n$  (**2**) dissolved in MeOH.
